# Supplementary material for: The direct synthesis of Zn-incorporated nanosized H-ZSM-5 zeolites using ZIF-8 as a template for enhanced catalytic performance
Source: Royal Society of Chemistry journal article supplement (doi:10.1039/c7ce00482f), 2017-01-01
Supplement: c7ce00482f1.pdf [file c7ce00482f1.pdf]

## Supplementary Information

### Direct synthesis of Zn-incorporated nanosized H-ZSM-5 zeolites with ZIF-8 as template for enhanced catalytic performance

Yunhao Zang, Xinfu Dong\*, Dan Ping, Chaojie Dong

School of Chemistry and Chemical Engineering, South China University of  
Technology, Guangzhou 510640, PR China

\*Corresponding author. Tel: +86 20 87110659

E-mail addresses: cexfdong@scut.edu.cn (X. Dong)

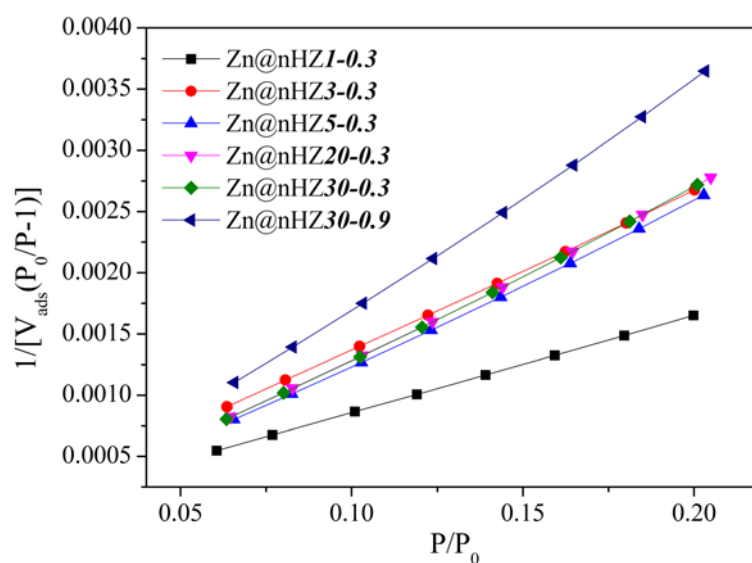

**Fig.S1** BET plots of Zn@nHZx-y.
